# Supplementary material
Source: MDPI journal article supplement (https://www.mdpi.com/2218-0532/92/1/11)
Supplement: s1 [file s1]

# QUESTIONNAIRE

Dear Sir/Madam, I am Józefina Sprawka, a 5th year Pharmacy student at the Karol Marcinkowski University of Medical Sciences in Poznań. This year, I am writing my master's thesis on "Analysis of the Possibilities of developing a pharmaceutical prescription in light of the State Drug Policy 2018-2022". As part of my master's thesis, I am preparing a project on researching the views of Polish pharmacists on foreign pharmacy and pharmaceutical care systems. The following survey was created to collect information on how pharmacists perceive the possibilities of expanding their competencies and increasing the role of pharmacists in the pharmacy. The data collected in the survey is anonymous and will be used for scientific purposes only.

Filling out the survey will take at most 5 minutes of your time.

I have read and understood the information regarding the study mentioned above. By starting the survey, I voluntarily agreed to participate in the research. I can withdraw my consent to participate in the further part of the study at any time without giving a reason. The study will be anonymous following the Personal Data Protection Act of May 10, 2018.

1. Age: .....

2. Sex:

- ☐ female
- ☐ male

3. Where do you work:

- ☐ rural area
- ☐ city with up to 50,000 inhabitants
- ☐ city with 50,000 to 100,000 inhabitants
- ☐ city with 100,000 to 500,000 inhabitants
- ☐ city with over 500,000 inhabitants

4. The type of pharmacy you work in:

- ☐ individual
- ☐ small chain (2 to 5 pharmacies)
- ☐ medium-sized pharmacy chain (up to 15 pharmacies)
- ☐ pharmacy chain (> 15 pharmacies)

5. Have you ever heard about the Pharmacists only medicines (POMs) category\*?

\*- Change of drug category from Rx to POMs, issued only by a pharmacist after conducting a specialized interview with the patient about symptoms and their health status.

☐ yes

☐ no

6. Do you agree with expanding the professional qualifications of a pharmacist?

☐ agree

☐ disagree

7. Would it be beneficial if some of the medicines were reclassified to POMs instead of the OTC (general sale) category?

☐ yes

☐ no

8. Please indicate three substances that, in your opinion, should be scheduled as POMs.  
(multiple-choice possibility)

☐ sildenafil

☐ mometasone

☐ ketoprofen

☐ trimebutine (in pills)

☐ inosine

☐ Levodropropizine (syrup)

☐ other ..... (please indicate the substance)

9. What kind of pharmaceutical services would you deliver?  
(multiple-choice possibility)

☐ immunization

☐ consulting (e.g., medicines review)

☐ performing diagnostic tests

☐ working with POMs

☐ medicines home delivery

☐ first aid facility

☐ nothing

☐ other ..... (please indicate the service)

10. Do you agree with the need to participate in additional courses giving the right to provide pharmaceutical services in the community?

☐ agree

☐ disagree

11. Who should pay for the additional pharmaceutical services?

- ☐ patient
- ☐ state
- ☐ pharmacy
- ☐ Mixed system (partially patient and the state)

12. Would incorporating the additional pharmaceutical services lead to better healthcare quality?

- ☐ yes
- ☐ no

13. Do you think patients expect higher professional qualifications from the pharmacists resulting from these pharmaceutical services?

- ☐ yes
- ☐ no

14. Please indicate what benefits, in your opinion, would be raised from the incorporation of POMs and other pharmaceutical services.

(multiple-choice possibility)

- ☐ better position at work
- ☐ reduced queues in healthcare
- ☐ saved time for a patient
- ☐ new work development possibilities
- ☐ improved healthcare quality
- ☐ higher salary
- ☐ there are no benefits

***Thank you for your engagement!***

Szanowni Państwo,

Nazywam się Józefina Sprawka jestem studentką 5 roku Farmacji z Uniwersytetu Medycznego im. Karola Marcinkowskiego w Poznaniu, w tym roku piszę pracę magisterską na temat "Analiza możliwości rozwoju uprawnień zawodowych farmaceutów w świetle polityki lekowej państwa na lata 2018-2022". W ramach pracy magisterskiej przygotowuję projekt dotyczący badania poglądów polskich farmaceutów na zagraniczne systemy funkcjonowania aptek i opieki farmaceutycznej. Poniższa ankieta powstała w celu zebrania informacji na temat postrzegania wśród farmaceutów możliwości poszerzenia uprawnień i zwiększenia roli farmaceuty w aptece.

Dane zebrane w ankiecie są anonimowe i zostaną wykorzystane jedynie do celów naukowych.

Wypełnienie ankiety zajmie Państwu nie więcej niż 5 minut.

Świadoma zgoda na udział w badaniu

Oświadczam, że przeczytałem/przeczytałam i zrozumiałem/zrozumiałam informacje dotyczące w/w badania. Rozpoczynając ankietę wyrażam dobrowolnie zgodę na udział w badaniu i jestem świadomy/świadoma, iż w każdej chwili mogę wycofać zgodę na udział w dalszej części badania, bez podania przyczyny. Badanie będzie anonimowe zgodnie z obowiązującym w Polsce prawem (Ustawa o Ochronie Danych Osobowych z 10.05.2018).

1. Wiek:

☐ .....

2. Płeć:

☐ kobieta

☐ mężczyzna

3. Wielkość miejscowości, w której Pan/Pani pracuje:

☐ wieś

☐ miasto do 50 000 mieszkańców

☐ miasto powyżej 50 000 do 100 000 mieszkańców

☐ miasto powyżej 100 000 do 500 000 mieszkańców

☐ miasto powyżej 500 000 mieszkańców

4. W jakiej aptece Pan/Pani pracuje?

- ☐ indywidualna
- ☐ apteka należąca do małej sieci (2 do 5 aptek)
- ☐ apteka należąca do sieci (do 15 aptek)
- ☐ apteka należąca do dużej sieci (powyżej 15 aptek)

5. Czy słyszał/a Pan/Pani o kategorii leków “pharmacist only” \* ?

\*- Zmiana kategorii leku z Rx na OTC wydawany tylko przez farmaceutę po przeprowadzeniu specjalistycznego wywiadu z pacjentem na temat objawów i jego stanu zdrowia.

- ☐ tak
- ☐ nie

6. Czy jest Pan/Pani za poszerzeniem uprawnień farmaceuty w aptece ogólnodostępnej?

- ☐ tak
- ☐ nie

7. Czy uważa Pan/Pani, że lepszym rozwiązaniem byłoby, gdyby część leków zmieniających kategorie z Rx mogłaby przejść na kategorię “pharmacist only” zamiast OTC?

- ☐ tak
- ☐ nie

8. Proszę wskazać trzy substancje, które zostały w ostatnim czasie zreklasyfikowane, a powinny Pana/Pani zdaniem uzyskać kategorię "pharmacist only" zamiast OTC.  
(możliwość wielokrotnego wyboru)

- ☐ sildenafil
- ☐ mometazon
- ☐ ketoprofen
- ☐ trimebutyna (w tabletkach)
- ☐ inozyna
- ☐ lewodropropizyna (syrop)
- ☐ inna odpowiedź .....

9. Jakie usługi gotów byłby Pan/Pani świadczyć, gdyby była taka możliwość? (możliwość wielokrotnego wyboru)

- ☐ szczepienia (poza listą Programu Szczepień Ochronnych)
- ☐ konsultacja z pacjentem m.in. monitorowanie i ocena farmakoterapii, przegląd lekowy
- ☐ wykonywanie podstawowych testów diagnostycznych tj. stężenie glukozy, kwasu moczowego we krwi, badania krzepliwości krwi
- ☐ wydawanie leków z kategorii “pharmacist only” i/lub akredytowanych substancji
- ☐ dostawa leków do domu dla osób, które mają utrudniony dostęp do apteki
- ☐ pełnienie funkcji punktu pierwszej pomocy (np. opatrywanie drobnych ran)
- ☐ żadne
- ☐ inna odpowiedź .....

10. Czy byłby w stanie Pan/Pani podjąć dodatkowe szkolenie w celu uzyskania kwalifikacji do wykonywania usług farmaceutycznych?

- ☐ tak
- ☐ nie

11. Kto według Pana/Pani powinien ponosić koszt świadczenia dodatkowych usług?

- ☐ pacjent
- ☐ państwo
- ☐ apteka
- ☐ system mieszany (część płaci pacjent a część państwo)

12. Czy uważa Pan/Pani, że wprowadzenie dodatkowych uprawnień dla farmaceutów podniosłoby jakością opieki zdrowotnej?

- ☐ tak
- ☐ nie

13. Czy według Pana/Pani wśród pacjentów istnieje potrzeba posiadania dodatkowych uprawnień przez farmaceutów i w efekcie prowadzenia usług farmaceutycznych?

- ☐ tak
- ☐ nie

14. Jakiego Pana/ Pani zdaniem byłyby możliwe korzyści wprowadzenia powyższych rozwiązań?  
(możliwość wielokrotnego wyboru)

- ☐ poprawa wizerunku farmaceuty
- ☐ ograniczenie kolejek do lekarzy
- ☐ zaoszczędzenie czasu pacjenta
- ☐ nowe możliwości rozwoju dla farmaceuty
- ☐ podniesienie jakości opieki zdrowotnej
- ☐ zwiększenie wynagrodzenia farmaceuty w związku z podniesieniem kwalifikacji
- ☐ nie widzę żadnych korzyści

*Dziękuję za poświęcony czas i pomoc!*
